# Supplementary material for: Gut microbiota regulation of P-glycoprotein in the intestinal epithelium in maintenance of homeostasis
Source: PubMed Central journal article supplement (PMC8425172; doi:10.1186/s40168-021-01137-3), 2021-09-07
Supplement: 40168_2021_1137_MOESM2_ESM.pdf [file 40168_2021_1137_MOESM2_ESM.pdf]

# Supplementary Figure 1.

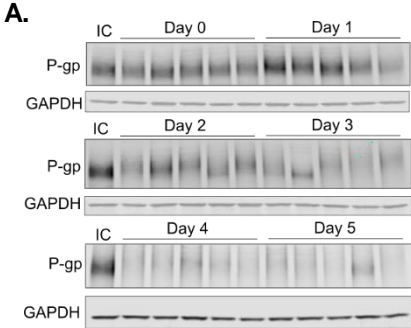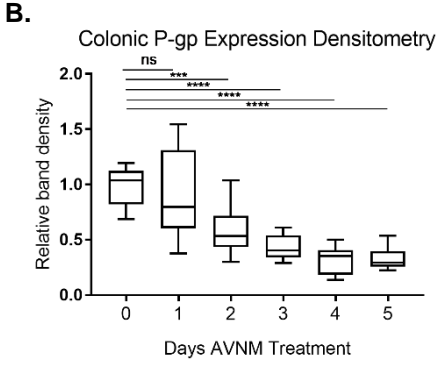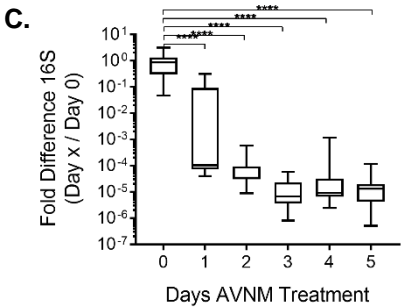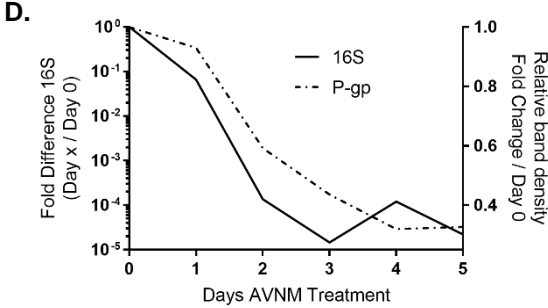

# Supplementary Figure 2.

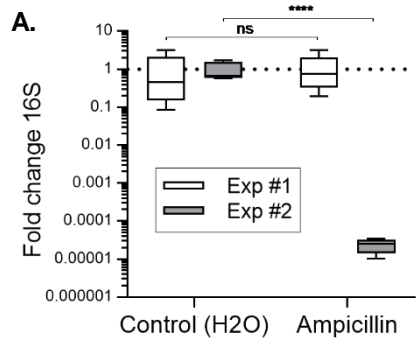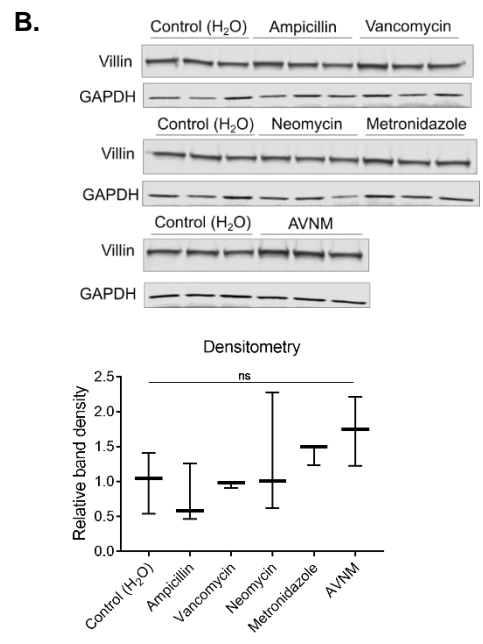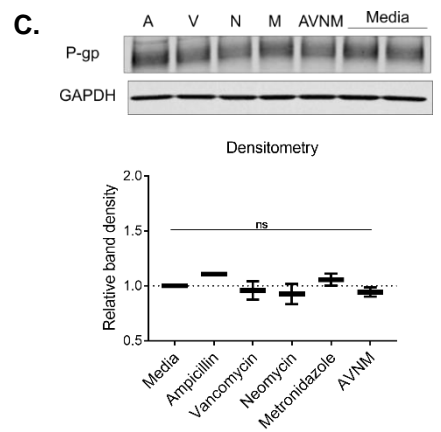

# Supplementary Figure 3.

A.

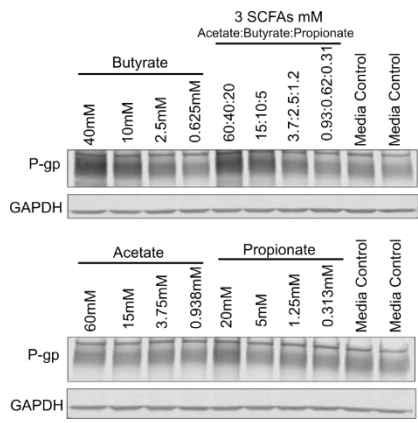

B.

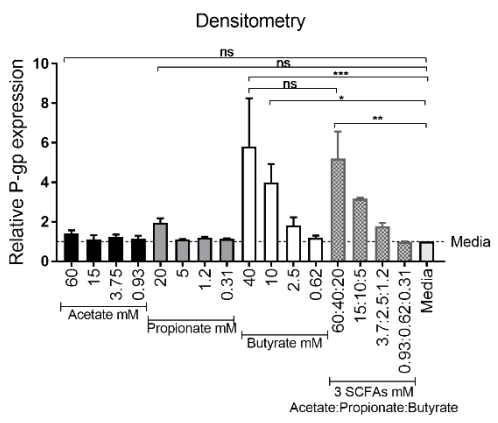

C.

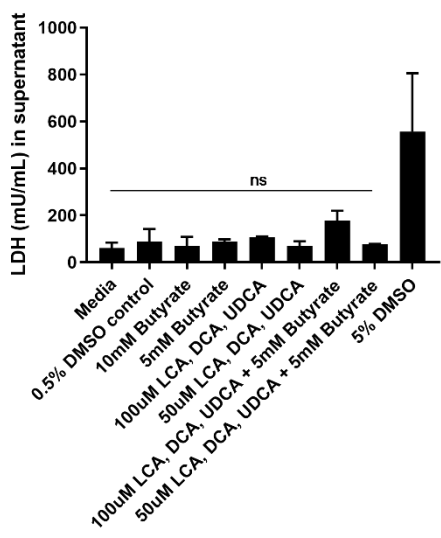

D.

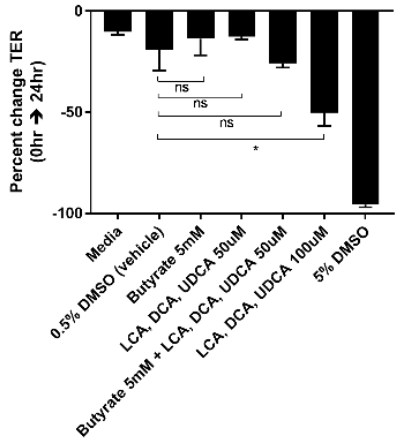

# Supplementary Figure 4.

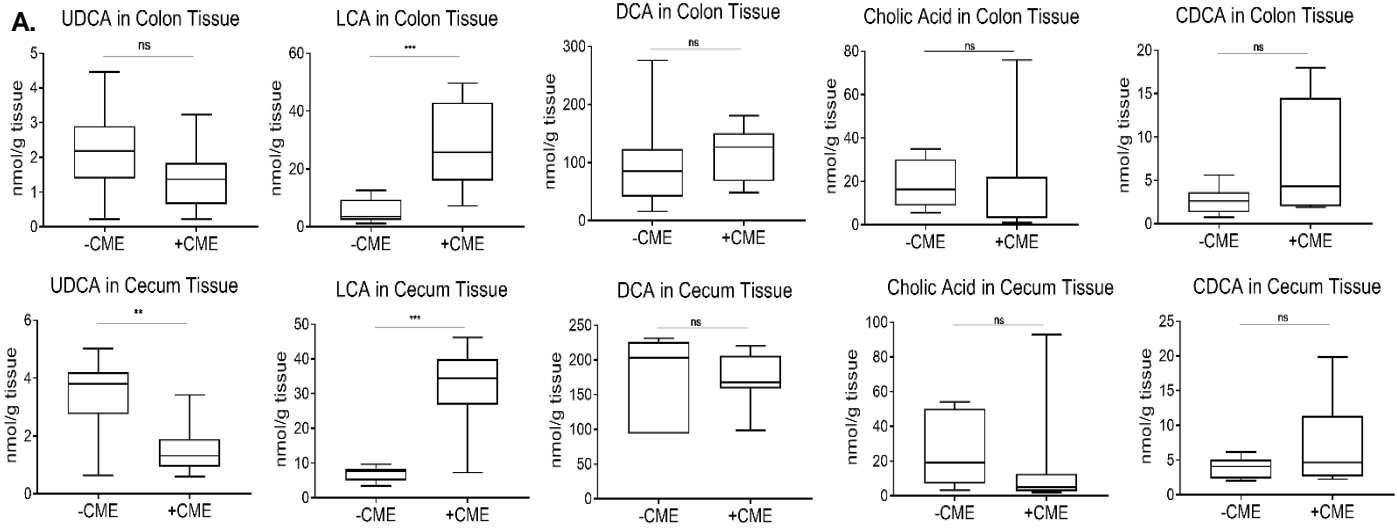

# Supplementary Figure 5.

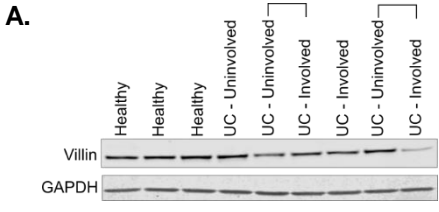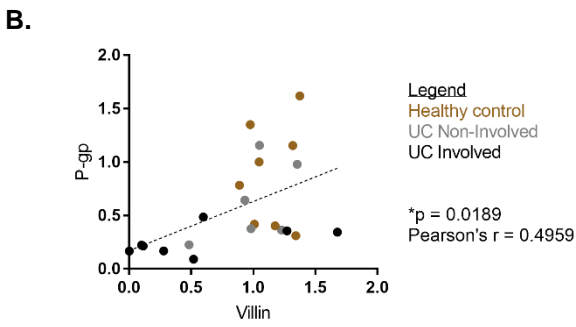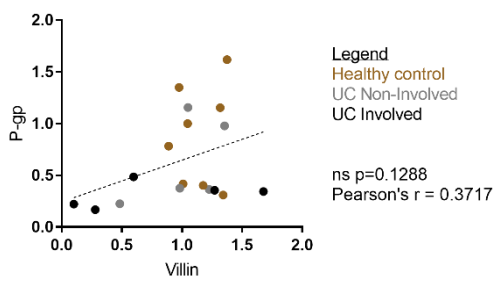

# Supplementary Table 1

| Phylum          | Class               | Order              | Family                 | Genus                  | pvalues     | rhovalues    |
|-----------------|---------------------|--------------------|------------------------|------------------------|-------------|--------------|
| Actinobacteria  | Actinobacteria      | Bifidobacteriales  | Bifidobacteriaceae     | Bifidobacterium        | 0.166884188 | 0.222865382  |
| Bacteroidetes   | Bacteroidia         | Bacteroidales      | Bacteroidaceae         | Bacteroides            | 0.500314679 | -0.109380863 |
| Bacteroidetes   | Bacteroidia         | Bacteroidales      | Porphyromonadaceae     | Odoribacter            | 0.347564815 | -0.152484311 |
| Bacteroidetes   | Bacteroidia         | Bacteroidales      | Porphyromonadaceae     | Parabacteroides        | 0.558859343 | -0.095232715 |
| Bacteroidetes   | Bacteroidia         | Bacteroidales      | Rikenellaceae          | Alistipes              | 0.067362036 | 0.292147744  |
| Bacteroidetes   | Sphingobacteriia    | Sphingobacteriales | Sphingobacteriaceae    | Pedobacter             | 0.120764092 | -0.249339167 |
| Firmicutes      | Bacilli             | Lactobacillales    | Lactobacillaceae       | Lactobacillus          | 0.000222592 | 0.551919425  |
| Firmicutes      | Clostridia          | Clostridiales      | Eubacteriaceae         | Eubacterium            | 0.077787779 | 0.282111008  |
| Firmicutes      | Clostridia          | Clostridiales      | Lachnospiraceae        | Blautia                | 0.031229478 | 0.34112605   |
| Firmicutes      | Clostridia          | Clostridiales      | Lachnospiraceae        | Butyrivibrio           | 0.189857936 | 0.211641113  |
| Firmicutes      | Clostridia          | Clostridiales      | Lachnospiraceae        | Dorea                  | 0.002656691 | 0.462516629  |
| Firmicutes      | Clostridia          | Clostridiales      | Oscillospiraceae       | Oscillibacter          | 0.001074512 | 0.498036551  |
| Firmicutes      | Clostridia          | Clostridiales      | Ruminococcaceae        | Anaerotruncus          | 0.067526704 | 0.291980007  |
| Firmicutes      | Clostridia          | Clostridiales      | Ruminococcaceae        | Subdoligranulum        | 0.016713528 | 0.376268523  |
| Firmicutes      | Negativicutes       | Selenomonadales    | Veillonellaceae        | Mitsuokella            | 0.079316686 | 0.280729335  |
| Proteobacteria  | Betaproteobacteria  | Burkholderiales    | Burkholderiales_noname | Burkholderiales_noname | 0.755206703 | 0.050878373  |
| Proteobacteria  | Betaproteobacteria  | Burkholderiales    | Sutterellaceae         | Parasutterella         | 0.231965492 | 0.193336483  |
| Proteobacteria  | Gammaproteobacteria | Enterobacteriales  | Enterobacteriaceae     | Enterobacter           | 0.001327494 | -0.490072975 |
| Proteobacteria  | Gammaproteobacteria | Enterobacteriales  | Enterobacteriaceae     | Escherichia            | 0.006811505 | -0.421099758 |
| Verrucomicrobia | Verrucomicrobiae    | Verrucomicrobiales | Verrucomicrobiaceae    | Akkermansia            | 0.468353503 | -0.117636023 |

# Supplementary Table 2

|                   | Sex (M/F) | Age (yr) | Diagnosis         | Medications past 30 days<br>(ND = no data)                                                                                                                                                                                                    | Fecal calprotectin<br>(ug/g feces)* |
|-------------------|-----------|----------|-------------------|-----------------------------------------------------------------------------------------------------------------------------------------------------------------------------------------------------------------------------------------------|-------------------------------------|
| High inflammation | M         | 35       | UC, pan-colitis   | ferrous sulfate, amlodipine, prednisone                                                                                                                                                                                                       | 3975.1                              |
|                   | M         | 54       | UC                | prednisone, azathioprine, amlodipine besylate, furosemide, metoprolol                                                                                                                                                                         | 2870.5                              |
|                   | M         | 52       | UC, pan-colitis   | acetaminophen, balsalazide, enoxaparin, famotidine, levothyroxine, melatonin, methylprednisolone IV, ondansetron, tamsulosin, tramadol                                                                                                        | 1085.3                              |
|                   | M         | 38       | UC**, pan-colitis | None                                                                                                                                                                                                                                          | 1005.9                              |
|                   | M         | 18       | UC                | melatonin                                                                                                                                                                                                                                     | 769.4                               |
|                   | F         | 35       | UC                | dicyclomine, mesalamine, multivitamin                                                                                                                                                                                                         | 552.0                               |
| Low inflammation  | F         | 34       | UC                | NuvaRing, ranitidine, ibuprofen, Colace                                                                                                                                                                                                       | 39.9                                |
|                   | M         | 48       | UC                | metformin, Harvoni, insulin, NovoLog, lisinopril, citaprolam, olanzapine, ReVia, trazodone                                                                                                                                                    | 8.9                                 |
|                   | M         | 38       | UC**              | mesalamine, prednisone                                                                                                                                                                                                                        | 7.2                                 |
|                   | M         | 46       | UC                | nystatin, albuterol, amlodipine, atorvastatin, azathioprine, cholecalciferol, folic acid, hydrochlorothiazide, losartan, metoprolol tartrate, montelukast, omeprazole, ondansetron, prazosin, prednisone, quetiapine, tizanidine, allopurinol | 7.4                                 |
|                   | F         | 72       | UC                | ND                                                                                                                                                                                                                                            | 6.2                                 |
|                   | F         | 43       | UC                | Solu-Medrol, morphine, Zolof, gabapentin, pantoprazole, trazodone, ondansetron, Asacol                                                                                                                                                        | 4.4                                 |
|                   | F         | 38       | UC                | betamethasone dipropionate, clonazepam, fluticasone propionate, ibuprofen, sertraline                                                                                                                                                         | 3.2                                 |
|                   | F         | 76       | UC                | azathioprine, adalimumab                                                                                                                                                                                                                      | 2.2                                 |
| No inflammation   | M         | 56       | Healthy           | ND                                                                                                                                                                                                                                            | 21.6                                |
|                   | F         | 18       | Healthy           | pantoprazole, Apri                                                                                                                                                                                                                            | 19.3                                |
|                   | F         | 21       | Healthy           | None                                                                                                                                                                                                                                          | 7.1                                 |
|                   | M         | 58       | Healthy           | None                                                                                                                                                                                                                                          | 6.6                                 |
|                   | F         | 50       | Healthy           | Zolof, clonazepam                                                                                                                                                                                                                             | 6.6                                 |
|                   | F         | 61       | Healthy           | metoprolol, naproxen, vitamin d                                                                                                                                                                                                               | 5.2                                 |
|                   | M         | 37       | Healthy           | Symbicort, trazodone, albuterol inhaler, fluticasone inhaler                                                                                                                                                                                  | 4.4                                 |
|                   | F         | 62       | Healthy           | lisinopril, glipizide, aspirin, atorvastatin                                                                                                                                                                                                  | 2.5                                 |
|                   | M         | 37       | Healthy           | Zolof                                                                                                                                                                                                                                         | 2.4                                 |
|                   | F         | 72       | Healthy           | ND                                                                                                                                                                                                                                            | 2.2                                 |
|                   | F         | 40       | Healthy           | oral contraception                                                                                                                                                                                                                            | 1.7                                 |
|                   | F         | 27       | Healthy           | ND                                                                                                                                                                                                                                            | 1.3                                 |
|                   | M         | 26       | Healthy           | ND                                                                                                                                                                                                                                            | 1.3                                 |
|                   | F         | 64       | Healthy           | ND                                                                                                                                                                                                                                            | 0.9                                 |

\*Fecal calprotectin determined by ELISA (Buhlmann)

\*\*Same patient, two separate clinic visits
